# Supplementary material for: Spatially distributed impacts of climate change and groundwater demand on the water resources in a wadi system
Source: Copernicus journal article supplement (doi:10.5194/hess-25-5065-2021), 2021-09-21
Supplement: Supplementary file 1 [file hess-25-5065-2021-supplement.pdf]

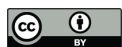

*Supplement of*

## **Spatially distributed impacts of climate change and groundwater demand on the water resources in a wadi system**

**Nariman Mahmoodi et al.**

*Correspondence to:* Nariman Mahmoodi ([nmahmoodi@hydrology.uni-kiel.de](mailto:nmahmoodi@hydrology.uni-kiel.de))

The copyright of individual parts of the supplement might differ from the article licence.

**Table S1: Non-parametric IHA scorecard for the model setup and the future periods under the three WUS-scenarios.**

|                                                                             | <b>Baseline<br/>period<br/>(1982-2011)</b> | <b>Future period 1<br/>(2030-2059)</b> |                  |                   | <b>Future period 2<br/>(2070-2099)</b> |                  |                   |
|-----------------------------------------------------------------------------|--------------------------------------------|----------------------------------------|------------------|-------------------|----------------------------------------|------------------|-------------------|
|                                                                             |                                            | No-<br>WUS                             | Constant-<br>WUS | Projected-<br>WUs | No-<br>WUS                             | Constant-<br>WUS | Projected-<br>WUs |
| <b>Normalization Factor</b>                                                 | 1                                          | 1                                      | 1                | 1                 | 1                                      | 1                | 1                 |
| <b>Mean annual flow (<math>\text{m}^3 \text{s}^{-1}</math>)</b>             | 12.13                                      | 10.66                                  | 9.94             | 9.23              | 6.13                                   | 5.84             | 5.5               |
| <b>Non-Normalized Mean<br/>Flow (<math>\text{m}^3 \text{s}^{-1}</math>)</b> | 12.13                                      | 10.66                                  | 9.94             | 9.23              | 6.13                                   | 5.84             | 5.5               |
| <b>Annual Coefficient of<br/>Variation (C. V).</b>                          | 2.99                                       | 4.39                                   | 4.5              | 4.63              | 4.76                                   | 4.9              | 5.06              |
| <b>Flow predictability</b>                                                  | 0.28                                       | 0.32                                   | 0.34             | 0.34              | 0.43                                   | 0.44             | 0.44              |
| <b>Constancy/predictability</b>                                             | 0.54                                       | 0.60                                   | 0.62             | 0.62              | 0.71                                   | 0.70             | 0.70              |
| <b>Percent of floods in 60d<br/>period</b>                                  | 0.38                                       | 0.38                                   | 0.38             | 0.38              | 0.38                                   | 0.38             | 0.38              |
| <b>Duration of flood-free season<br/>(day)</b>                              | 10                                         | 48                                     | 48               | 48                | 124                                    | 124              | 124               |
| <b>Low Pulse Threshold (<math>\text{m}^3 \text{s}^{-1}</math>)</b>          | 0.28                                       | -                                      | -                | -                 | -                                      | -                | -                 |
| <b>High Pulse Threshold (<math>\text{m}^3 \text{s}^{-1}</math>)</b>         | 9.71                                       | -                                      | -                | -                 | -                                      | -                | -                 |

# i)NO-WUS Scenario

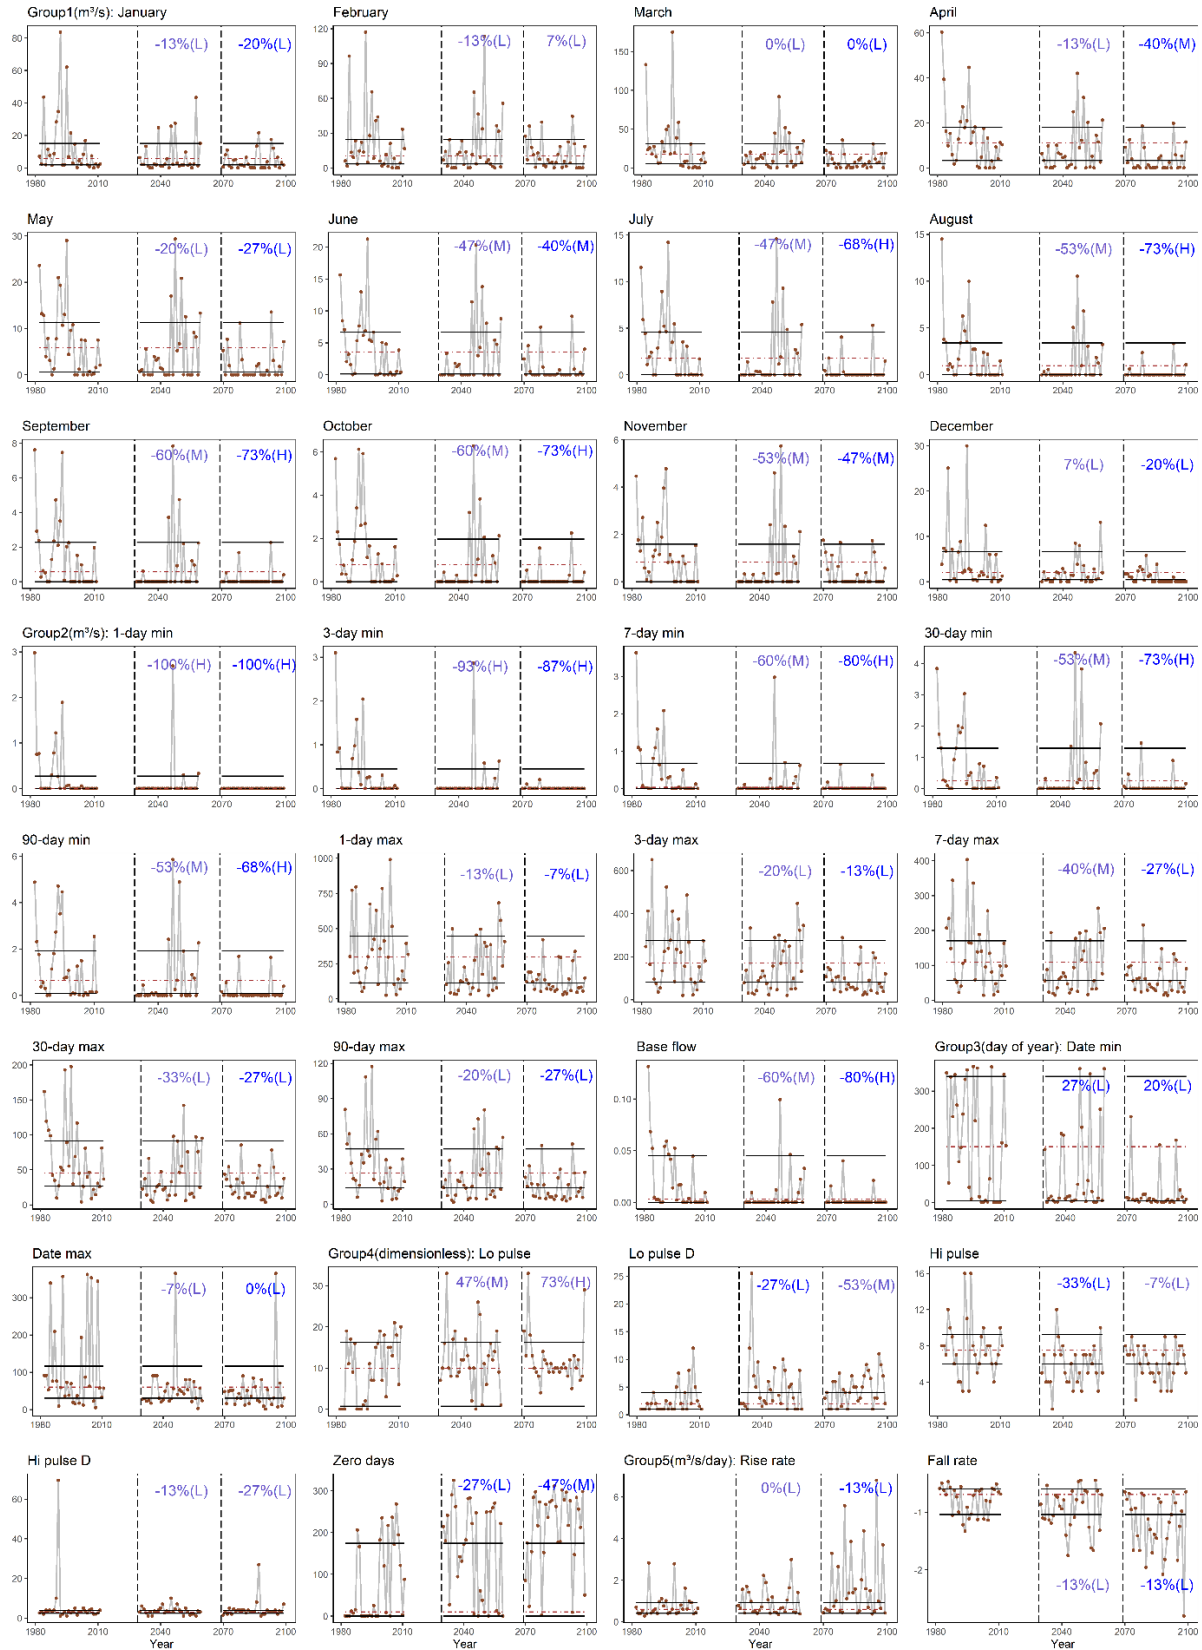

## ii)Constant-WUS Scenario

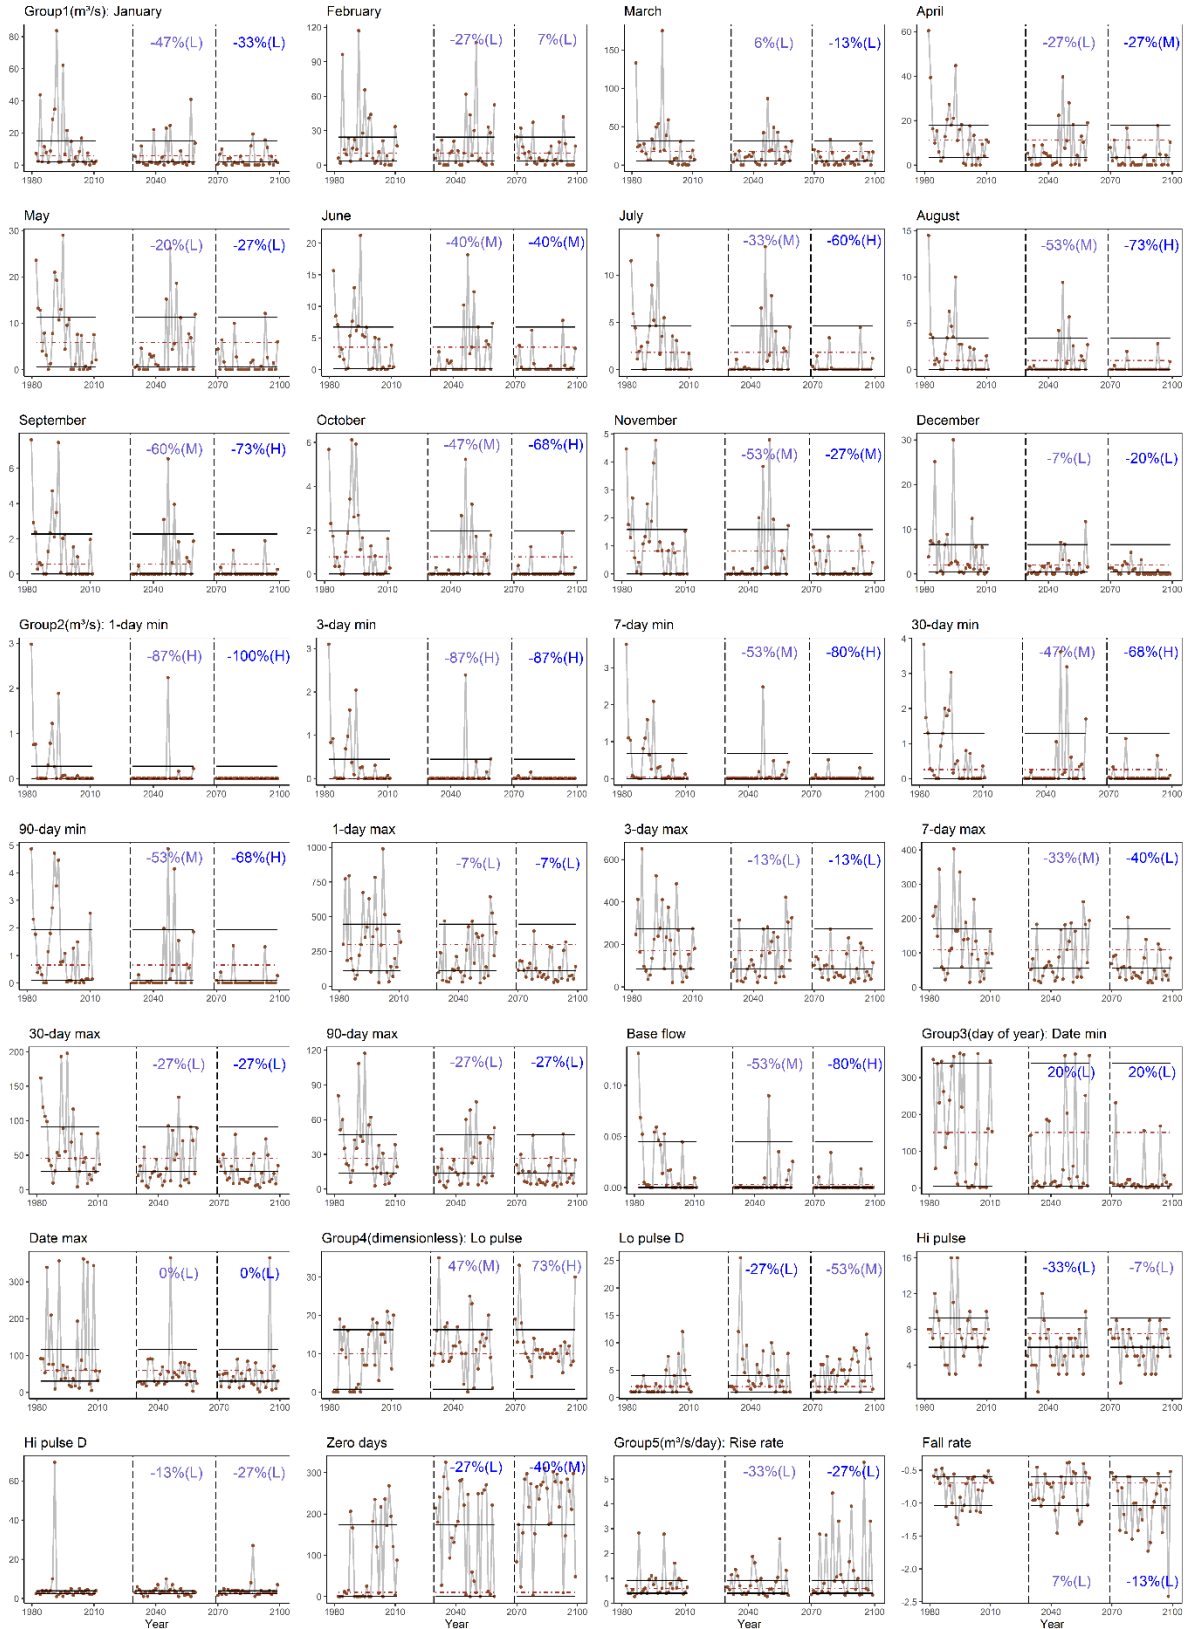

### iii)Projected-WUS Scenario

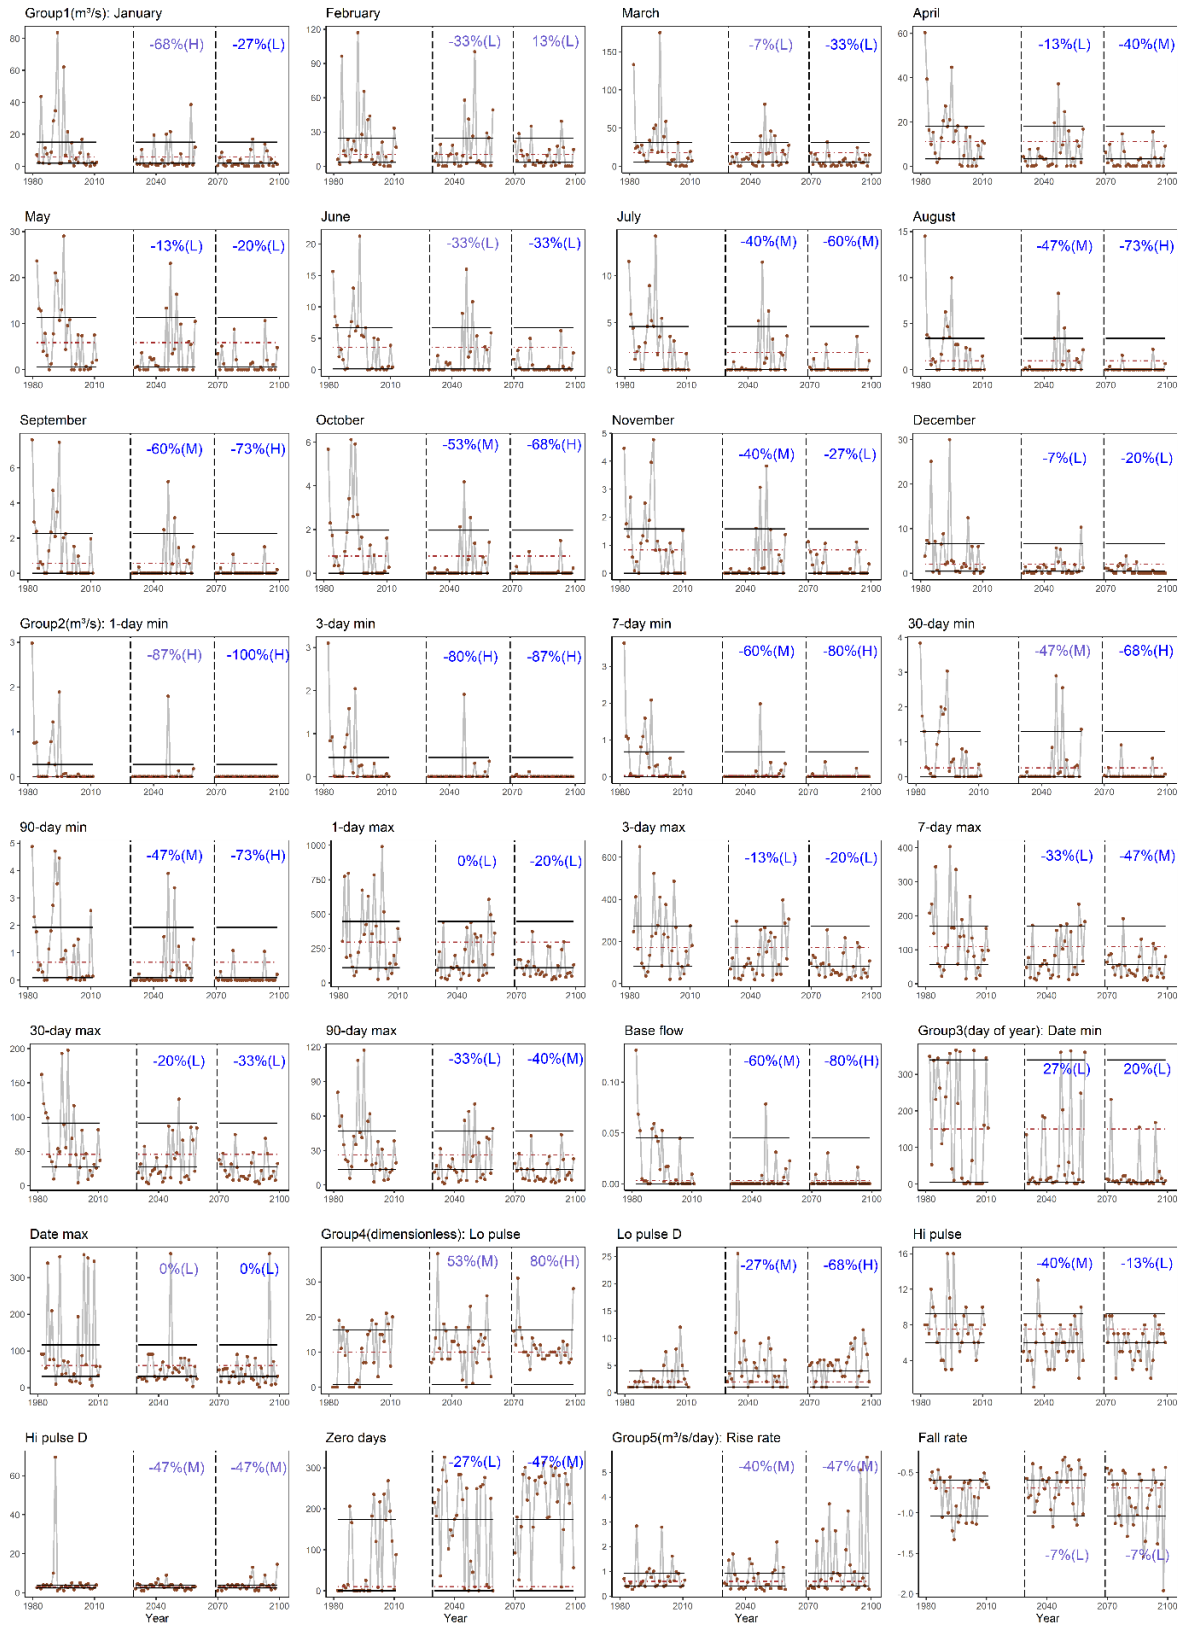

**Figure S1: Alteration of 32 IHA (Indicators of Hydrologic Alteration) under three water use system scenarios in the future: No-WUS: the water use systems are not considered, Constant-WUS: the number of water use systems in the basin remain unaltered in the future, and Projected-WUS: the number of water use systems increase linearly with population growth. The red horizontal dashed line shows the median for the model setup period. The black horizontal lines represent the low and high-threshold of RVA (The Range of Variability Approach). The number indicates RVA deviation (%) in light blue and dark blue respectively for insignificant and significant changes.**

# i)No-WUS Scenario

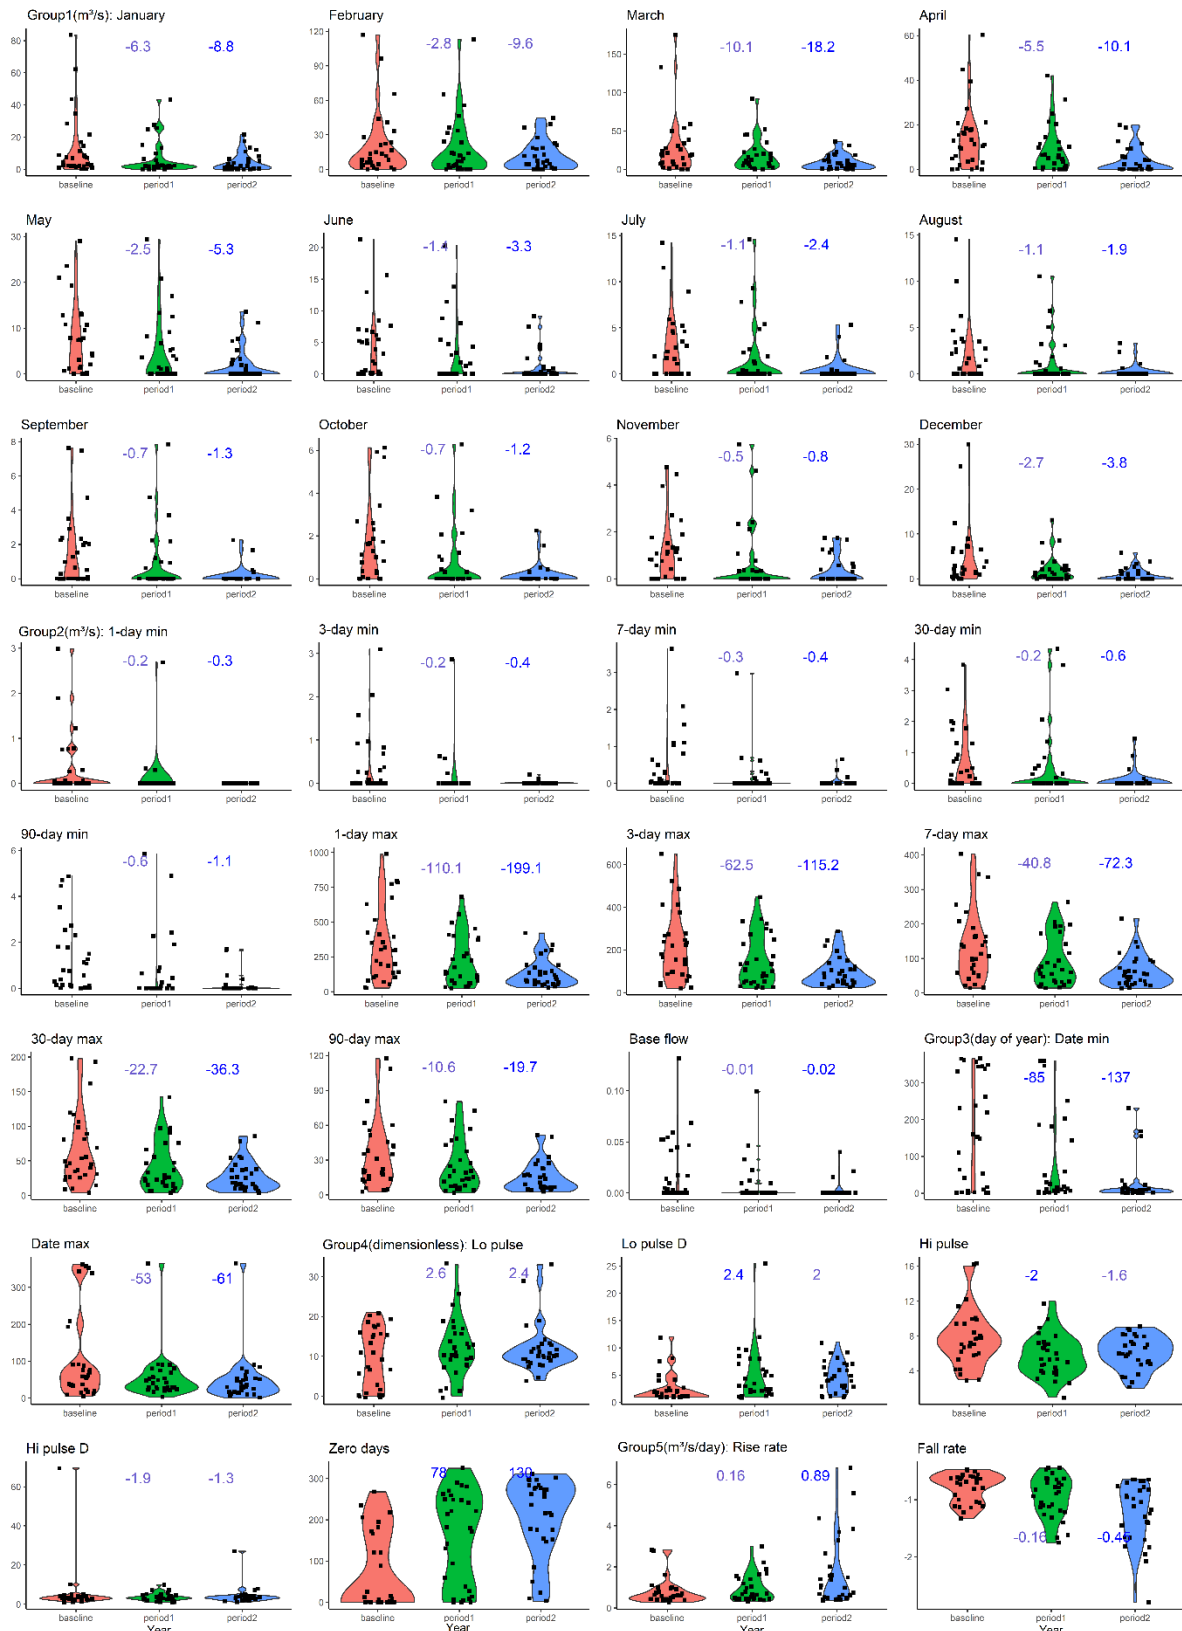

## ii)Constant-WUS Scenario

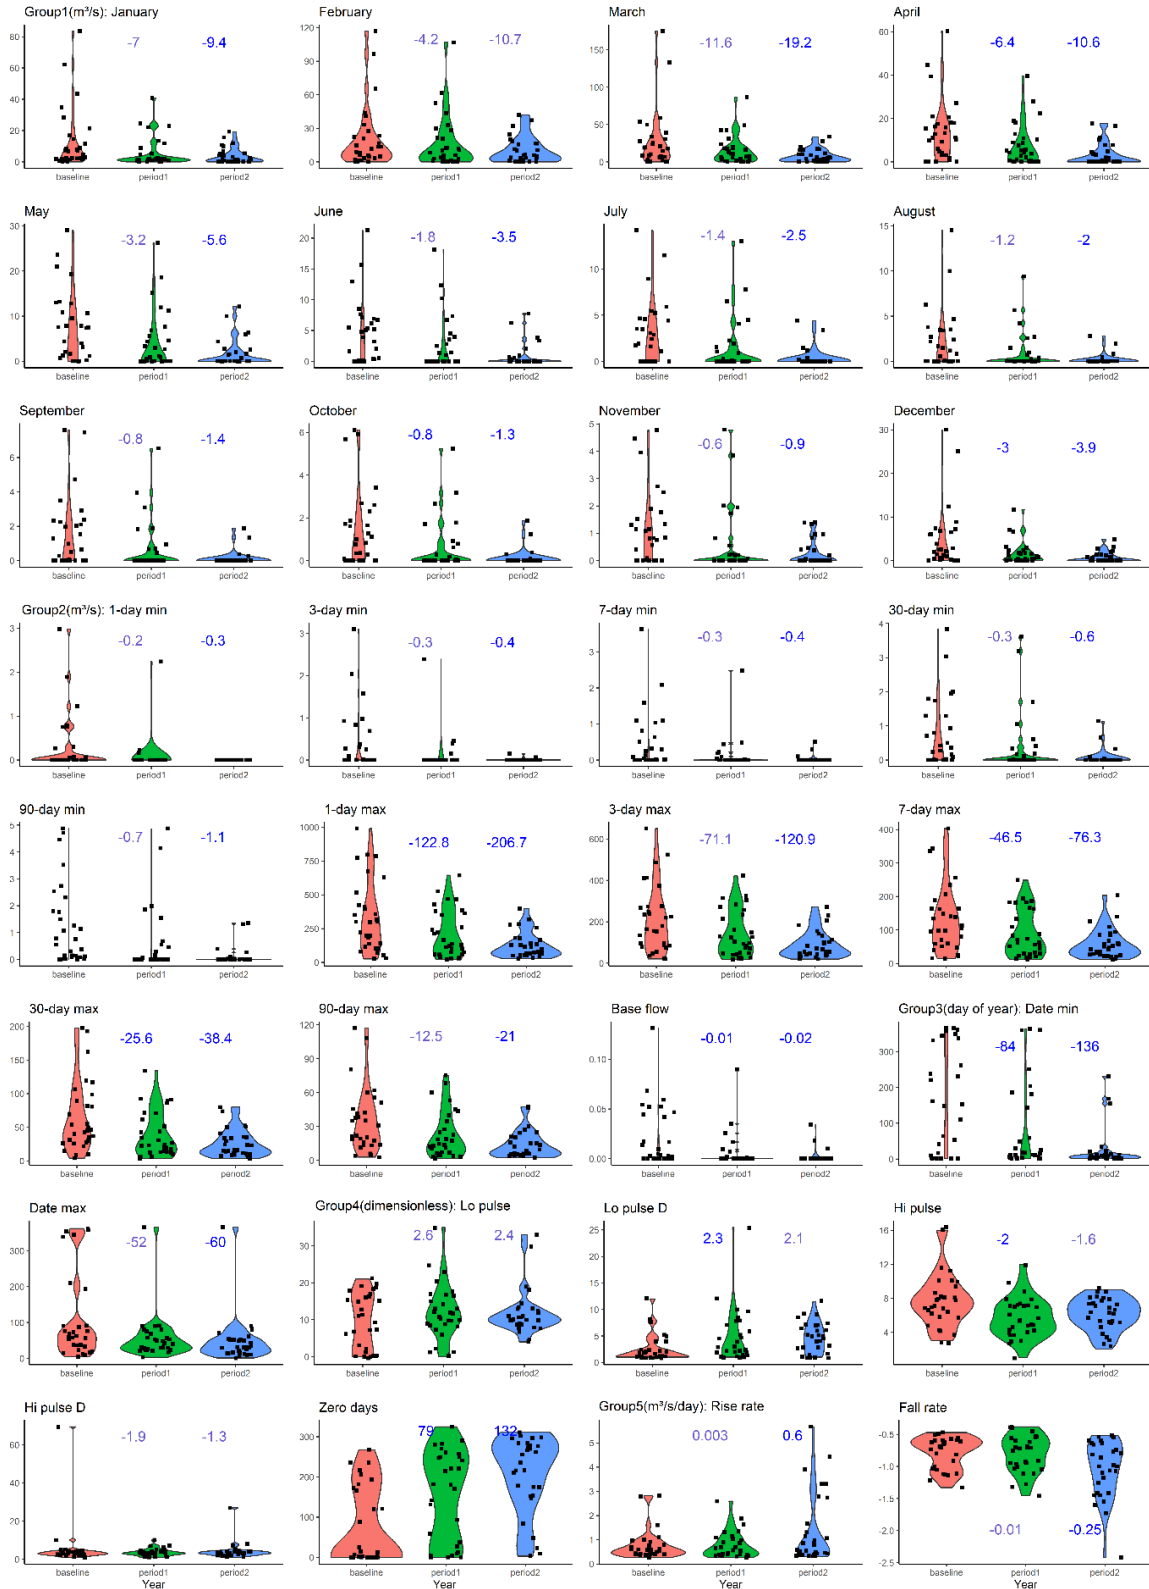



### iii)Projected-WUS Scenario

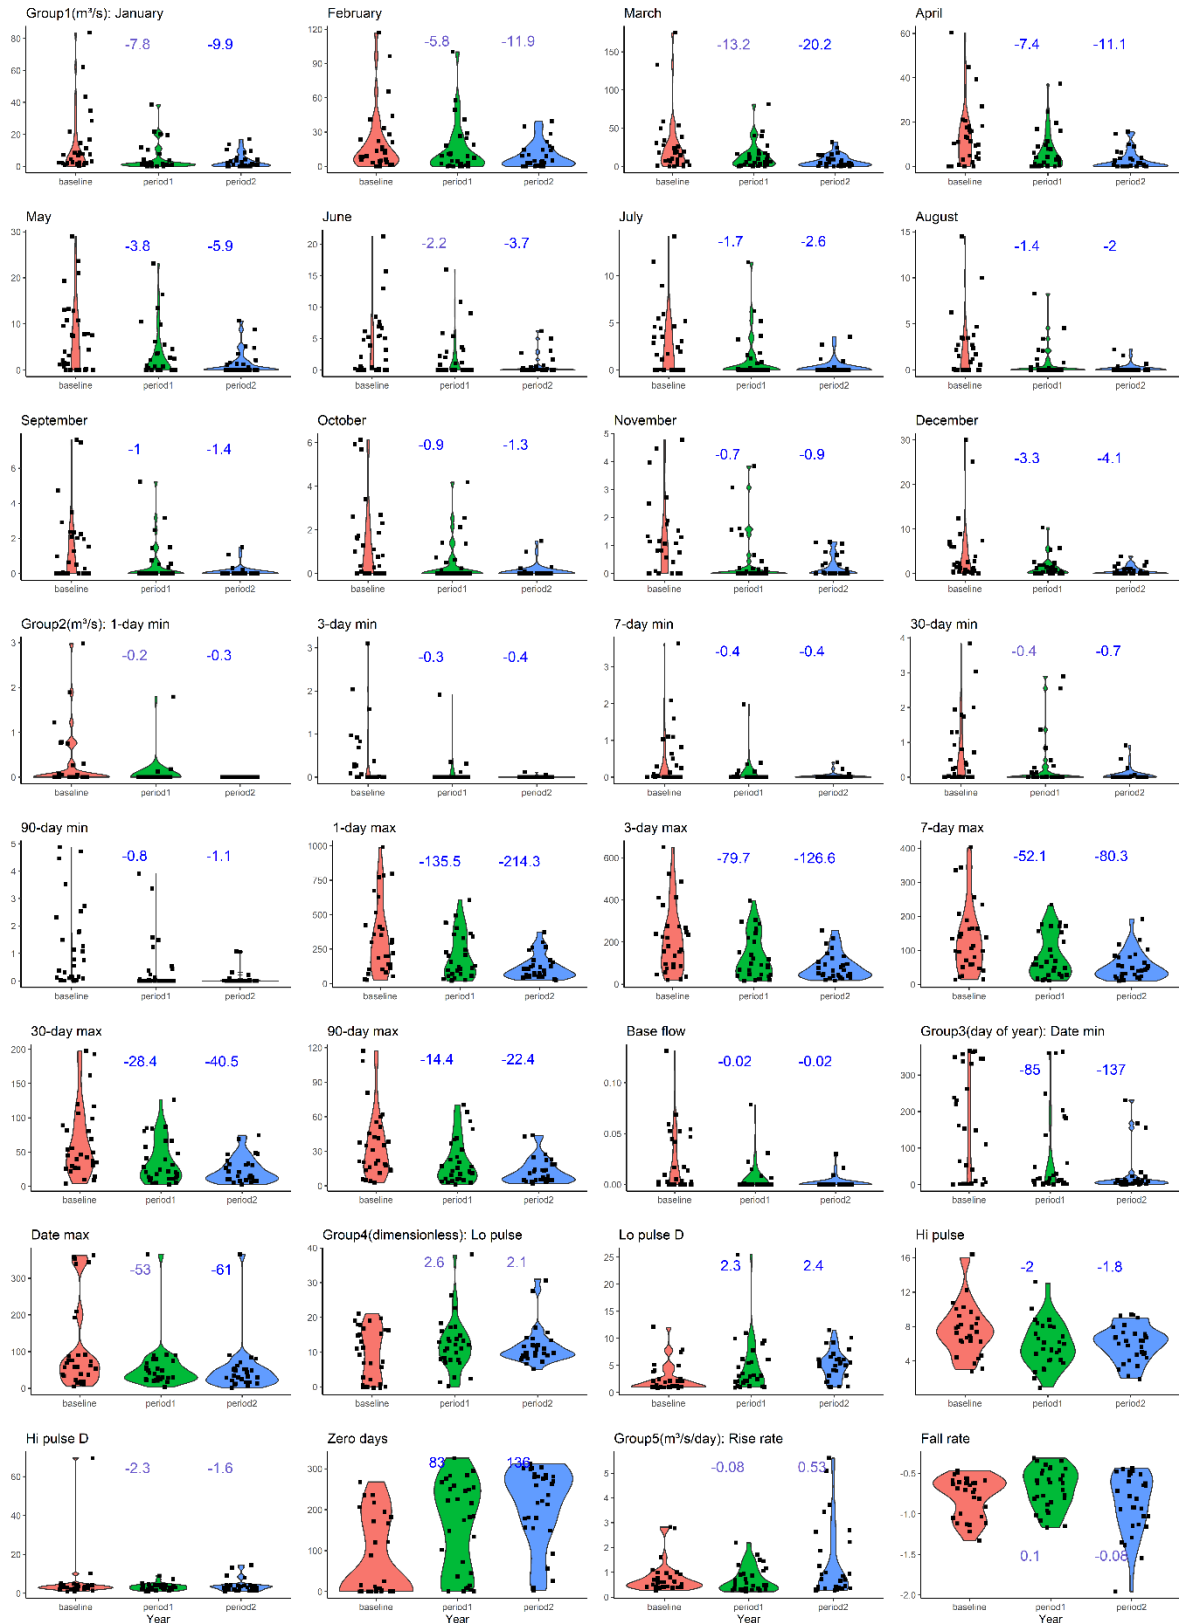

**Figure S2: Distribution of annual values for each indicator under three water use system scenarios in the future: No-WUS: the water use systems are not considered, Constant-WUS: the number of water use systems in the basin remain unaltered in the future, and Projected-WUS: the number of water use systems increase linearly with population growth. Each single dot represents the value calculated for a specific indicator e.g., month January, in a year. Absolute changes are highlighted in light and dark blue respectively for insignificant and significant changes.**
